# Supplementary material for: Longitudinal Association between Sarcopenia and Cognitive Impairment among Older Adults in Rural Malaysia
Source: MDPI journal article supplement (doi:10.3390/ijerph19084723), 2022-04-13
Supplement: s1 [file s1]

## Supplementary table

**Table S1 Longitudinal association of sarcopenia and cognitive impairment**

| Exposure                    | Unadjusted model |                                   |         | Fully adjusted model <sup>3</sup> |                                      |         |
|-----------------------------|------------------|-----------------------------------|---------|-----------------------------------|--------------------------------------|---------|
|                             | b                | Crude RR <sup>2</sup><br>(95% CI) | P value | b                                 | Adjusted RR <sup>2</sup><br>(95% CI) | P value |
| Sarcopenia                  |                  |                                   |         |                                   |                                      |         |
| No                          |                  | 1                                 |         |                                   | 1                                    |         |
| Yes                         | 0.76             | 2.13(1.46-3.09)                   | <0.001  | 0.59                              | 1.80(1.18-2.75)                      | 0.01    |
| Age                         |                  |                                   |         |                                   |                                      |         |
| 60-69                       |                  | 1                                 |         |                                   | 1                                    |         |
| 70-79                       | 0.19             | 1.21(0.95-1.53)                   | 0.12    | 0.10                              | 1.10(0.86-1.41)                      | 0.45    |
| ≥80                         | 0.71             | 2.04(1.5-2.78)                    | <0.001  | 0.27                              | 1.3(1.1-1.88)                        | 0.02    |
| Gender                      |                  |                                   |         |                                   |                                      |         |
| Male                        |                  | 1                                 |         |                                   | 1                                    |         |
| Female                      | 0.18             | 1.19(0.96-1.48)                   | 0.11    | 0.15                              | 1.16(0.92-1.46)                      | 0.22    |
| PASE Quartiles <sup>1</sup> |                  |                                   |         |                                   |                                      |         |
| Q4                          |                  | 1                                 |         |                                   | 1                                    |         |
| Q3                          | 0.06             | 1.06(0.72-1.57)                   | 0.77    | 0.01                              | 1.01(0.68-1.5)                       | 0.97    |
| Q2                          | 0.44             | 1.56(1.07-2.27)                   | 0.02    | 0.37                              | 1.44(0.98-2.12)                      | 0.06    |
| Q1                          | 0.88             | 2.42(1.74-3.36)                   | <0.001  | 0.63                              | 1.87(1.32-2.66)                      | <0.001  |
| Depressive symptoms         |                  |                                   |         |                                   |                                      |         |
| No                          |                  | 1                                 |         |                                   | 1                                    |         |
| Yes                         | 0.77             | 2.15(1.68-2.75)                   | <0.001  | 0.74                              | 2.10(1.63-2.7)                       | <0.001  |
| Chronic pain                |                  |                                   |         |                                   |                                      |         |
| No                          |                  | 1                                 |         |                                   | 1                                    |         |
| Yes                         | 0.54             | 1.72(1.35-2.19)                   | <0.001  | 0.33                              | 1.39(1.08-1.79)                      | 0.01    |
| Visual Impairment           |                  |                                   |         |                                   |                                      |         |
| No                          |                  | 1                                 |         |                                   | 1                                    |         |
| Yes                         | 0.20             | 1.22(0.97-1.53)                   | 0.09    | 0.02                              | 1.02(0.8-1.3)                        | 0.86    |
| Hearing Impairment          |                  |                                   |         |                                   |                                      |         |
| No                          |                  | 1                                 |         |                                   | 1                                    |         |
| Yes                         | 0.53             | 1.69(1.25-2.28)                   | <0.001  | 0.31                              | 1.37(1.05-1.91)                      | 0.04    |

<sup>1</sup> Q: Quartile

<sup>2</sup> RR : Relative Risk

<sup>3</sup>Fully adjusted model, adjusted for age, gender, physical activities, depressive symptoms, chronic pain visual and hearing impairment.

**Table S2 Longitudinal association of severe sarcopenia and cognitive impairment**

| Exposure                    | Unadjusted model |                                   |         | Fully adjusted model <sup>3</sup> |                                      |         |
|-----------------------------|------------------|-----------------------------------|---------|-----------------------------------|--------------------------------------|---------|
|                             | b                | Crude RR <sup>2</sup><br>(95% CI) | P value | b                                 | Adjusted RR <sup>2</sup><br>(95% CI) | P value |
| Severe Sarcopenia           |                  |                                   |         |                                   |                                      |         |
| No                          |                  | 1                                 |         |                                   | 1                                    |         |
| Yes                         | 1.05             | 2.85(1.95-4.15)                   | <0.001  | 0.77                              | 2.01(1.24-3.27)                      | <0.001  |
| Age                         |                  |                                   |         |                                   |                                      |         |
| 60-69                       |                  | 1                                 |         |                                   | 1                                    |         |
| 70-79                       | 0.18             | 1.2(0.95-1.5)                     | 0.12    | 0.12                              | 1.12(0.88-1.43)                      | 0.34    |
| ≥80                         | 0.66             | 1.94(1.43-2.63)                   | <0.001  | 0.29                              | 1.34(0.92-1.96)                      | 0.13    |
| Gender                      |                  |                                   |         |                                   |                                      |         |
| Male                        |                  | 1                                 |         |                                   | 1                                    |         |
| Female                      | 0.23             | 1.26(1.02-1.55)                   | <0.001  | 0.31                              | 1.36(1.05-1.76)                      | 0.02    |
| PASE Quartiles <sup>1</sup> |                  |                                   |         |                                   |                                      |         |
| Q4                          |                  | 1                                 |         |                                   | 1                                    |         |
| Q3                          | 0.01             | 1.01(0.69-1.48)                   | 0.96    | -0.08                             | 0.92(0.63-1.36)                      | 0.69    |
| Q2                          | 0.42             | 1.52(1.06-2.18)                   | 0.02    | 0.32                              | 1.38(0.95-1.99)                      | 0.09    |
| Q1                          | 0.86             | 2.37(1.72-3.25)                   | <0.001  | 0.74                              | 2.1(1.5-2.94)                        | <0.001  |
| Depressive symptoms         |                  |                                   |         |                                   |                                      |         |
| No                          |                  | 1                                 |         |                                   | 1                                    |         |
| Yes                         | 0.77             | 2.15(1.68-2.75)                   | <0.001  | 0.73                              | 2.09(1.62-2.68)                      | <0.001  |
| Chronic pain                |                  |                                   |         |                                   |                                      |         |
| No                          |                  | 1                                 |         |                                   | 1                                    |         |
| Yes                         | 0.54             | 1.72(1.35-2.19)                   | <0.001  | 0.33                              | 1.39(1.08-1.79)                      | 0.01    |
| Visual Impairment           |                  |                                   |         |                                   |                                      |         |
| No                          |                  | 1                                 |         |                                   | 1                                    |         |
| Yes                         | 0.19             | 1.21(0.97-1.51)                   | 0.09    | 0.10                              | 1.11(0.88-1.4)                       | 0.38    |
| Hearing Impairment          |                  |                                   |         |                                   |                                      |         |
| No                          |                  | 1                                 |         |                                   | 1                                    |         |
| Yes                         | 0.51             | 1.66(1.24-2.22)                   | <0.001  | 0.37                              | 1.45(1.04-2)                         | 0.03    |

<sup>1</sup> Q: Quartile

<sup>2</sup> RR : Relative Risk

<sup>3</sup>Fully adjusted model, adjusted for age, gender, physical activities, depressive symptoms, chronic pain visual and hearing impairment.
